# Supplementary material for: 3D extracellular matrix microenvironment in bioengineered tissue models of primary pediatric and adult brain tumors
Source: PubMed Central journal article supplement (PMC6778192; doi:10.1038/s41467-019-12420-1), 2019-10-04
Supplement: 41467_2019_12420_MOESM1_ESM.pdf [file 41467_2019_12420_MOESM1_ESM.pdf]

1 3D Extracellular Matrix Microenvironment in Bioengineered Tissue Models of Primary  
2 Pediatric and Adult Brain Tumors

3  
4  
5  
6

Sood et al.

7 Supplementary Information

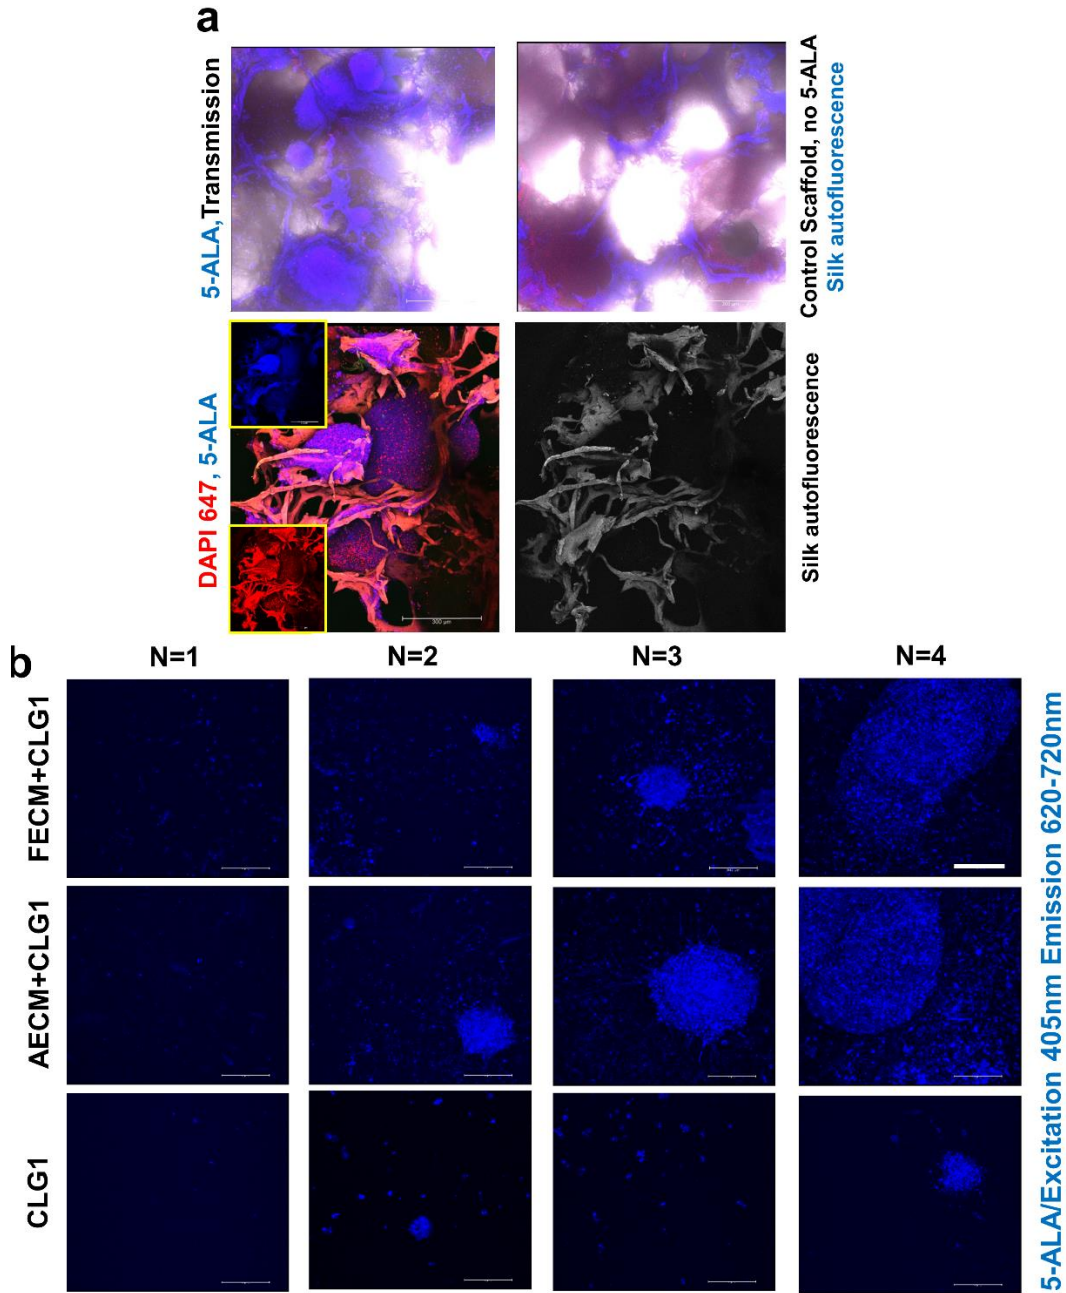

8  
 9 Supplementary Figure 1: 5-aminolevulinic acid live imaging of glioblastoma cultured in 3D constructs for tracking migration  
 10 into the central hydrogel window (a) 5-Aminolevulinic acid (5-ALA) preferential accumulation (post 48-90hrs incubation) and  
 11 fluorescence in 4 mo GBM cells within the 3D silk-scaffold constructs as seen in blue against a background of silk transmission  
 12 image (top left) and overlay with live DAPI stain (bottom left). Control scaffolds without added 5-ALA and DAPI 647 to  
 13 indicate silk autofluorescence levels as seen in the corresponding right panels. Max projection of Z-stacks imaged in Leica SP8  
 14 confocal. Scale bar 300  $\mu$ m. (b) Migration of GBM cells within the central hydrogel window at 4 mo across different hydrogel  
 15 conditions as measured live by 5-ALA. Max projection of Z-stacks imaged in Leica SP8 confocal. Scale bar 100  $\mu$ m. N refers  
 16 to separate scaffold samples.

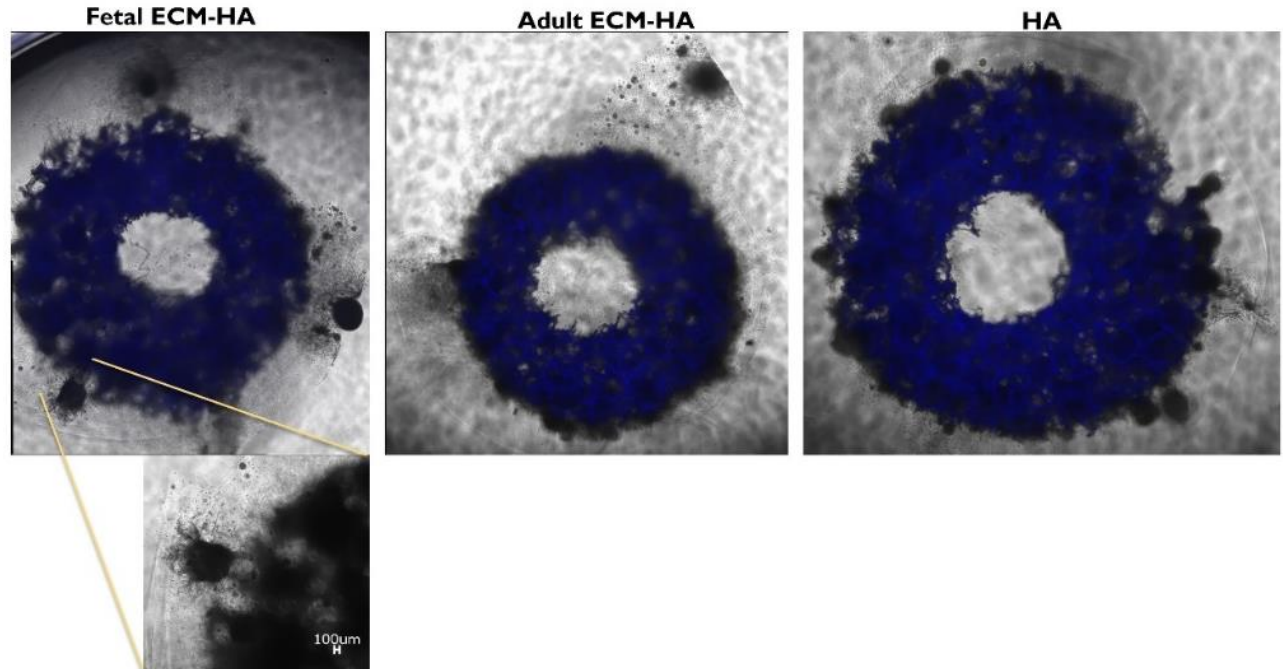

17  
18  
19  
20  
21  
22

Supplementary Figure 2: GBM cell seeded-scaffold infused with HA-based hydrogels indicating migration of fibrous tumor spheres in the gel extending out from the outer ring of the scaffold referred to as outer edge gel. Greatest migration in the outer edge gel was noticed within fetal-ECM enriched HA cultures as indicated in the left inset. DAPI channel overlaid to demarcate the scaffold using its autofluorescence in this channel. Scale bar=100µm.

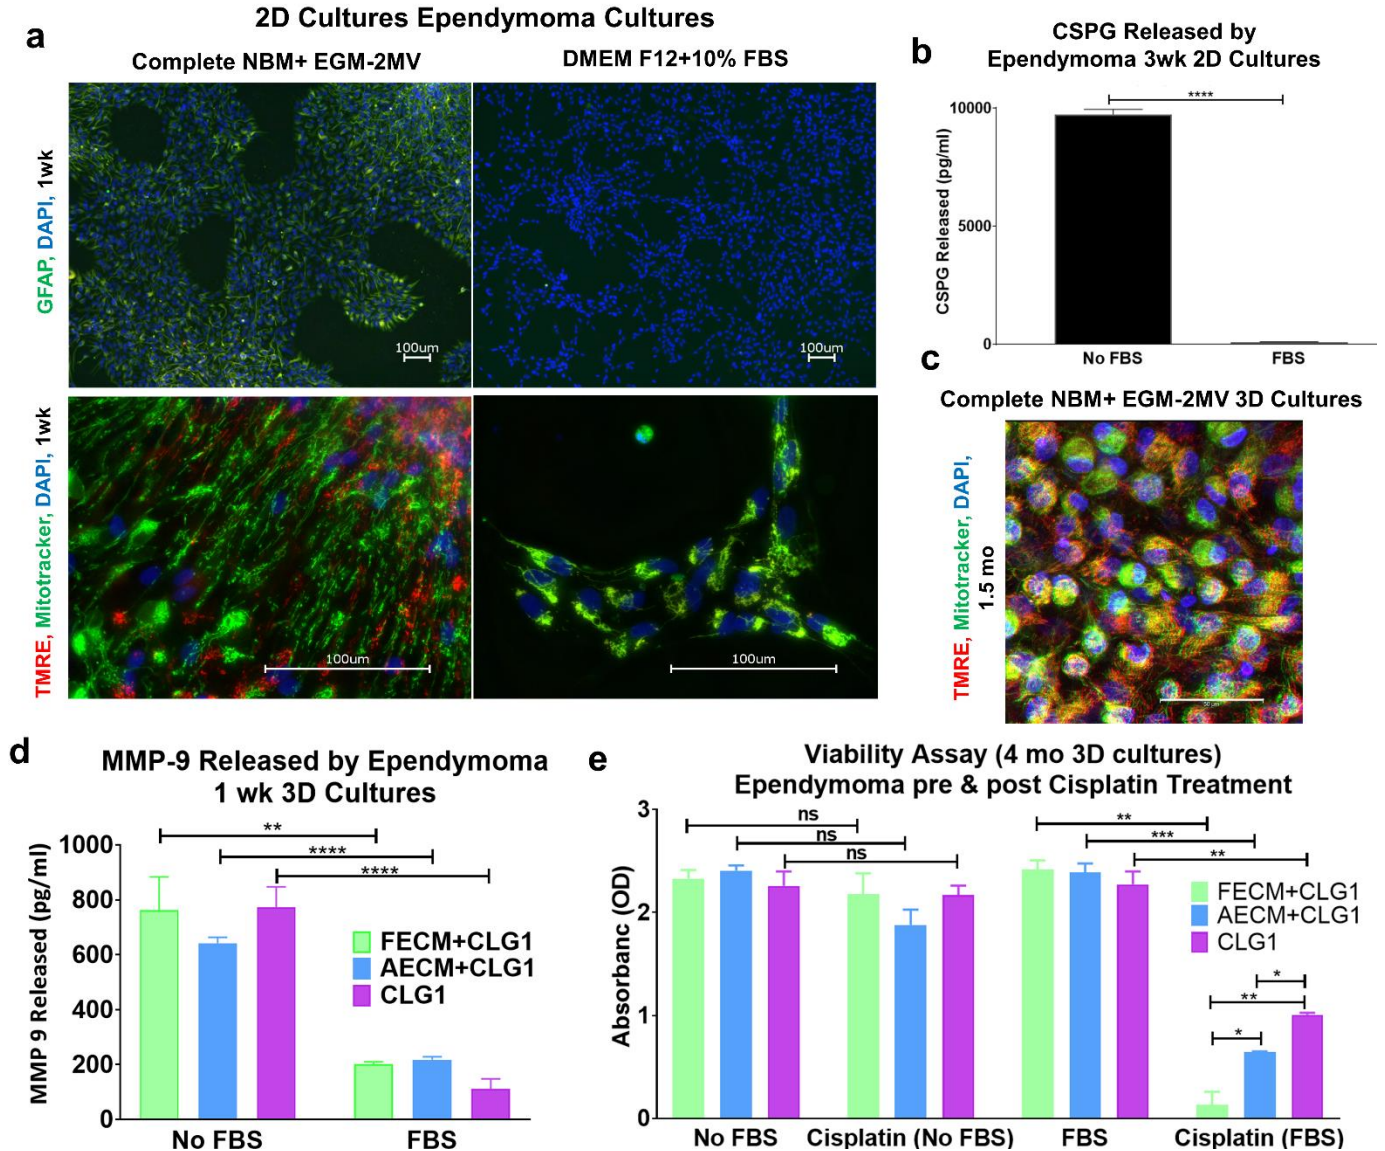

23

24 Supplementary Figure 3: Media optimization for culture of patient brain-derived tumors leading to altered drug response. (a)  
 25 Pseudo-rosettes characteristic of ependymoma observed in tumor cells cultured in 2D in media lacking FBS (complete  
 26 neurobasal: NBM+ endothelial media EGM-2MV) as shown by GFAP stained cells (upper left panel) and greater capacity of  
 27 mitochondrial activity was indicated by Mitotracker that stains all mitochondria in conjunction with TMRE staining for  
 28 mitochondrial membrane potential (lower left panel), as opposed to cells grown in FBS containing DMEM+F12 media (right  
 29 panel). Scale bar 100µm. (b) Chondroitin sulfate proteoglycan (CSPG) release observed to be significantly higher in 2D  
 30 cultures of ependymoma in media lacking FBS. Unpaired two-tailed t-test, \*\*\*\*p<0.0001. (c) Metabolic activity of  
 31 ependymoma in 3D constructs at 1.5 mo. High capacity of mitochondrial activity in ependymoma cells within 3D constructs  
 32 when cultured in serum free media, was indicated by dual mitochondrial staining with MitoTracker and TMRE. Max  
 33 projection of Z-stacks imaged using Leica SP8 confocal. Scale bar 100µm. (d) MMP-9 release in media from ependymoma  
 34 3D cultures at 1 wk significantly greater in media lacking FBS, regardless of the infused hydrogel. Unpaired two-tailed t-test,  
 35 n=4, \*\*p=0.0026, \*\*\*\*p<0.0001. (e) Similar viability seen across different ECM and media conditions in 4 mo 3D  
 36 ependymoma cultures, however the response to cisplatin treatment was more pronounced in the cultures with FBS containing  
 37 media. Unpaired two-tailed t-test between individual pairs assuming equal SD, n=3 before cisplatin treatment, n=2 post-  
 38 cisplatin treatment; \*p< 0.0330, \*\*p< 0.0046, \*\*\*p= 0.0008, \*\*\*\*p<0.0001. Error bars indicate mean±s.d. Source data are  
 39 provided as a Source Data file.  
 40

41

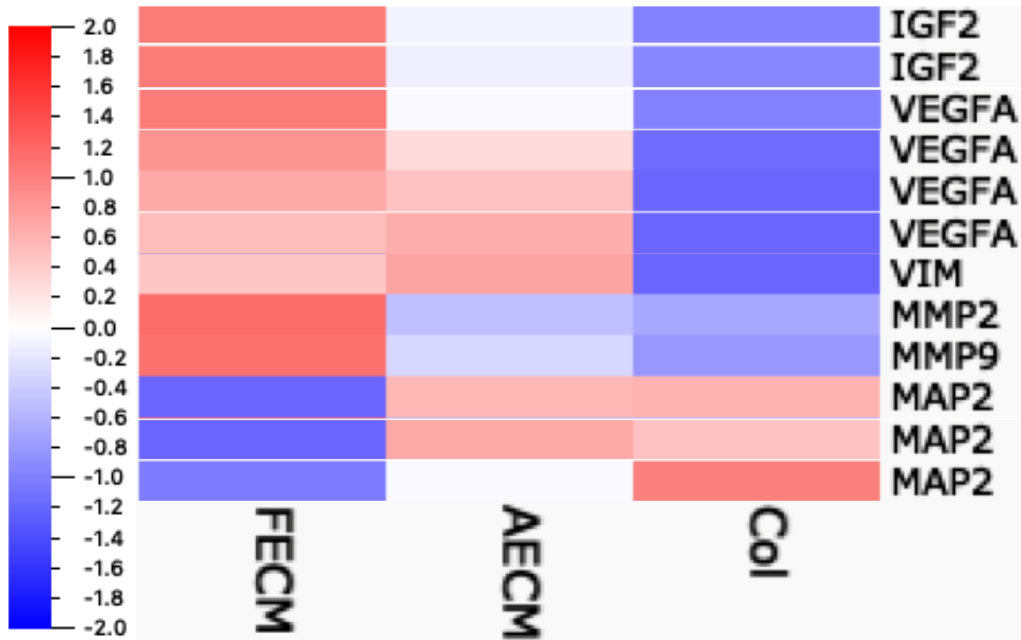

42  
43  
44  
45  
46  
47  
48  
49  
50

Supplementary Figure 4: Some genes relevant to anaplastic ependymoma from the RNA sequencing data of 3D bioengineered cultures. Heat map generated using FPKM (Reads Per Kilobase of transcript per Million mapped reads) values. Multiple gene variants/isoforms shown for VEGFA: vascular endothelial factor A, MAP2: Microtubule-associated protein 2, IGF2: Insulin growth factor 2. VIM: Vimentin, MMP9: Matrix metalloproteinase 9, MMP2: Matrix metalloproteinase 2. Source data are provided as a Source Data file.

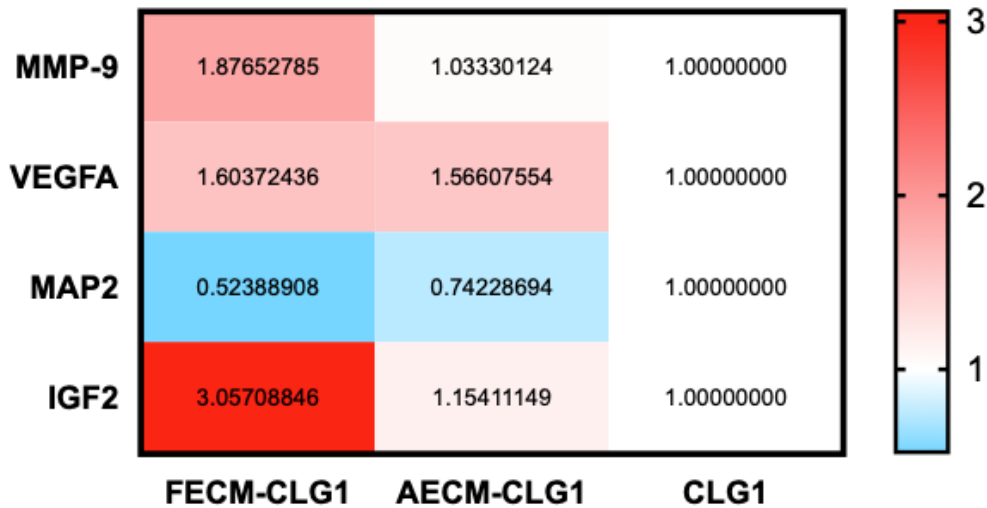

51  
52  
53  
54  
55  
56

Supplementary Figure 5: mRNA expression of select genes known to be altered in ependymoma, shown here to be altered within ependymoma bioengineered cultures as measured using PCR. Fold expression change relative to unsupplemented collagen (CLG1) cultures.



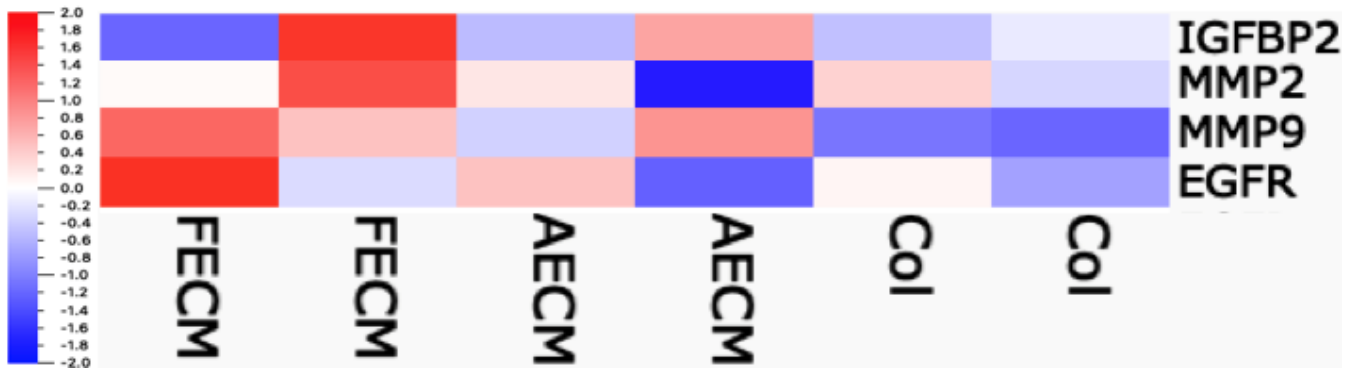

57  
58  
59  
60  
61  
62  
63

Supplementary Figure 6: Some genes relevant to glioblastoma from the RNA sequencing data of 3D bioengineered cultures. Heat map generated using FPKM (Reads Per Kilobase of transcript per Million mapped reads) values. IGFBP2: Insulin Like Growth Factor Binding Protein 2, MMP2: Matrix metalloproteinase 2, EGFR: Epidermal growth factor receptor, MMP9: Matrix metalloproteinase 9. Source data are provided as a Source Data file.

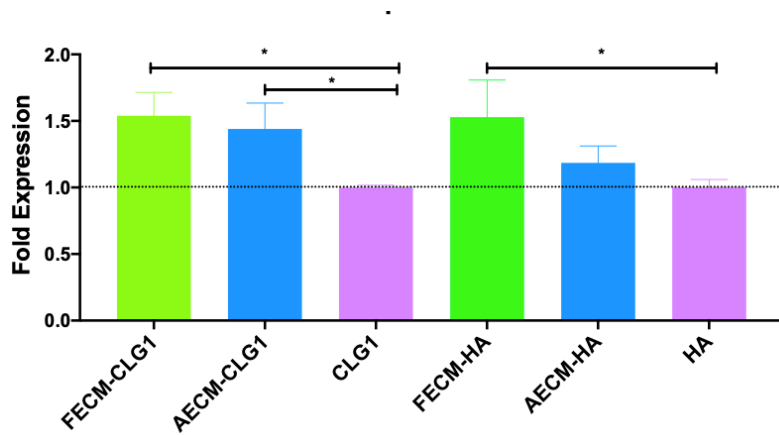

64  
65  
66  
67  
68  
69  
70  
71

Supplementary Figure 7: EGFR mRNA expression in GBM bioengineered cultures. For the CLG1 (collagen I) set n=2/ condition, for HA (hyaluronic acid) set n=3/ condition. Fold expression relative to CLG1/HA as control conditions. One-tailed t-test to compare to control CLG1/HA condition for the corresponding sets assuming equal SD; \*p< 0.0434. Error bars indicate mean±s.d. Source data are provided as a Source Data file.

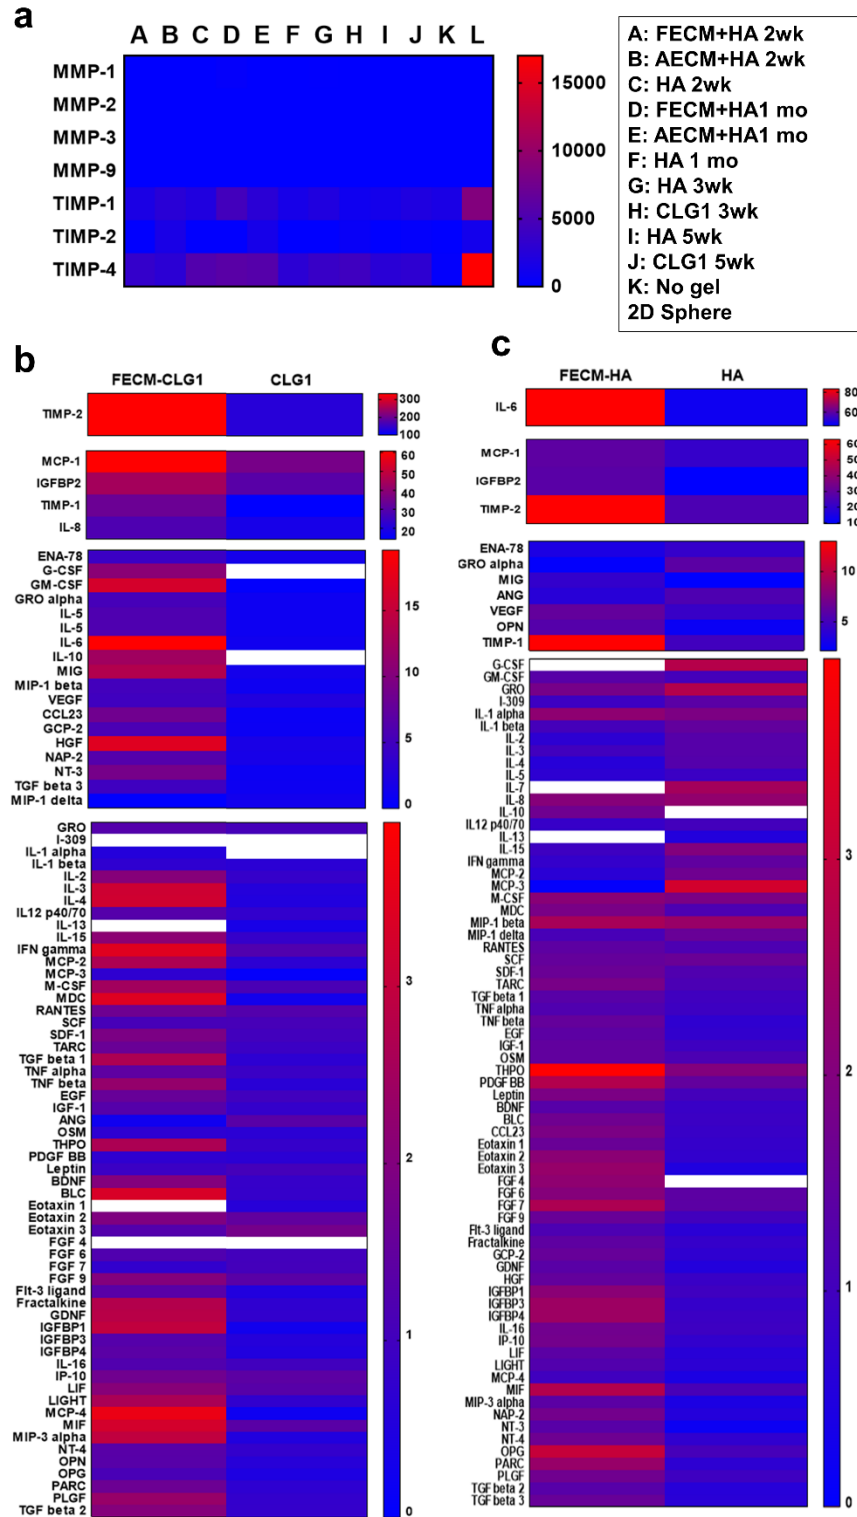

72  
 73 Supplementary Figure 8: Entire panel of cytokine and MMP/TIMP profiling of media from glioblastoma cultures. (a)  
 74 MMP/TIMP release profile of 3D GBM cultures infused with HA-based hydrogels alongside 3D GBM constructs with no  
 75 hydrogel added and 2D sphere cultures (reported in pg/ml). (b) Complete cytokine release profile at 1 mo of 3D GBM  
 76 cultures infused with CLG1-based hydrogels. (c) Cytokine release profile at 6.5 mo of 3D GBM cultures infused with HA-  
 77 based hydrogels 5.5 mo time point (reported as fold change over control media). Source data are provided as a Source Data  
 78 file.

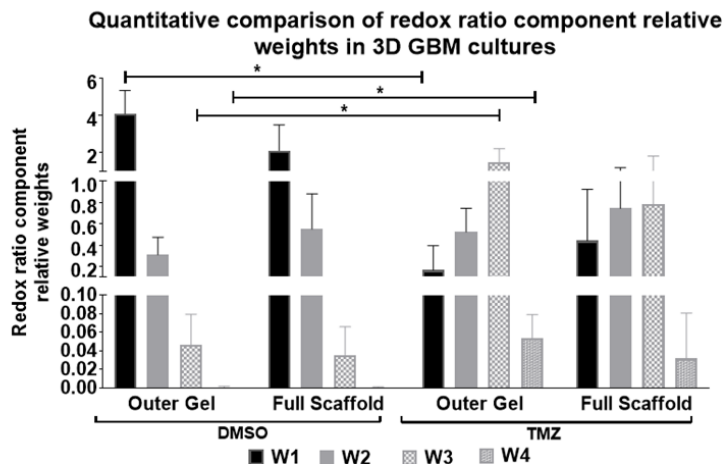

80

81 Supplementary Figure 9: Quantitative comparison of redox ratio component relative weights in the 3D GBM cultures. The  
 82 relative weights in the control DMSO treated samples suggest a highly glycolytic cell population in both groups, as  
 83 Component 1 is most prominent in the distributions. Following TMZ treatment, Components 3 and 4 become more highly  
 84 weighted, representative of more oxidative phosphorylation and decreased glycolysis. The outer gel and scaffold groups  
 85 respond differently to treatment as cells in the outer gel have significantly greater relative weight in both Component 3 and 4,  
 86 suggesting increased oxidative stress in these cells. “W1” =  $W1 / (W2 + W3 + W4)$ , “W2” =  $W2 / (W1 + W3 + W4)$ , “W3” =  
 87  $W3 / (W1 + W2 + W4)$ , “W4” =  $W4 / (W1 + W2 + W3)$ , etc.). \* $p < 0.0347$ ; Unpaired two-tailed t-tests between separate pairs  
 88 within each component assuming equal SD;  $n=3$ / condition (multiple areas imaged per condition). Error bars indicate  
 89 mean  $\pm$  s.e.m. Source data are provided as a Source Data file.

90

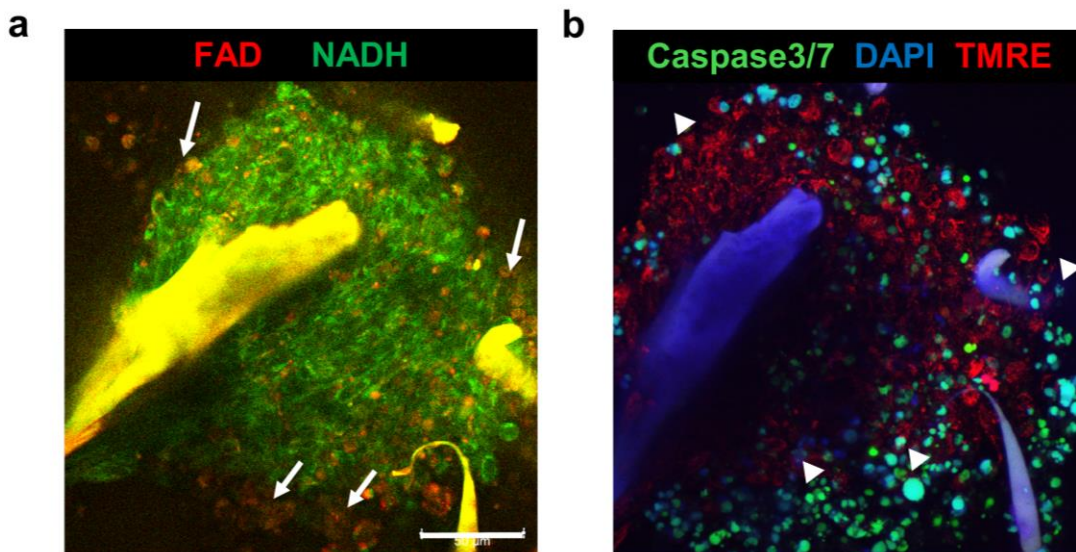

91

92 Supplementary Figure 10: Staining of apoptotic cells post metabolic imaging. (a) Overlaid endogenous fluorescence signals of  
 93 NADH and FAD from GBM cells within silk-HA constructs, imaged by two-photon excitation at 755nm and 860nm,  
 94 respectively. Cells demonstrating morphological changes shown by arrows. The bright yellow areas correspond to silk. (b)  
 95 Cells co-stained post endogenous imaging with caspase 3/7 and DAPI indicating apoptotic cells (indicated by arrow heads),  
 96 imaged using confocal microscope. Dark blue areas correspond to silk. Scale bar 50 $\mu$ m.

97

98



**a Derivation and Expansion of Tumor Cells in Defined Adhesive Conditions**

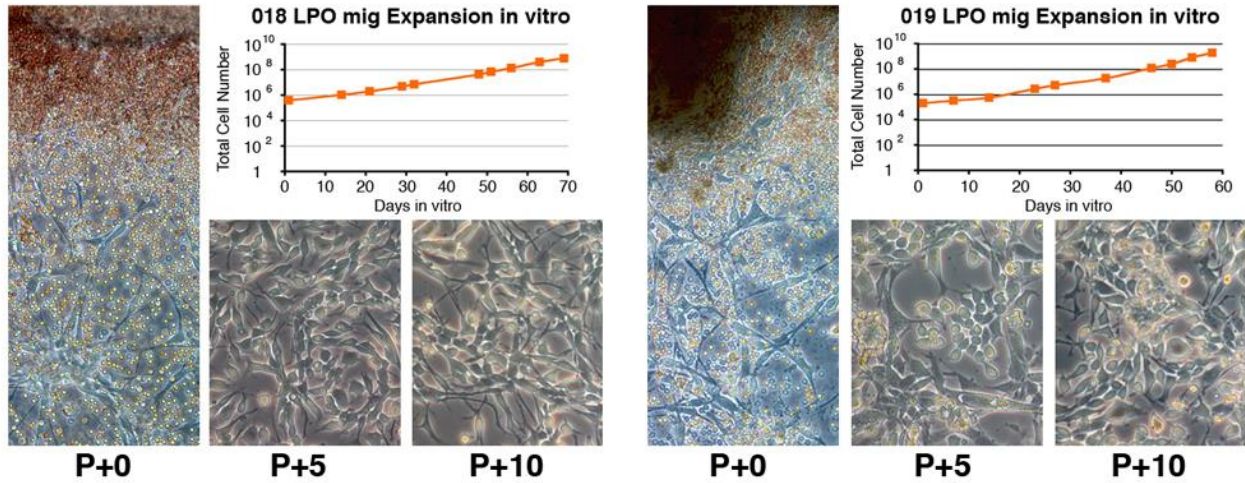

**b Analysis of Adhesive Cell Populations in Standard Neurosphere Assay**

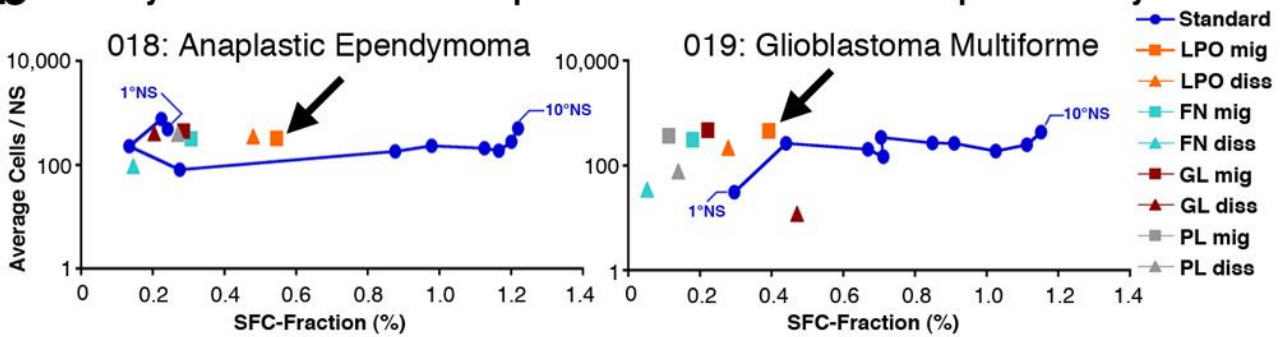

99

100 Supplementary Figure 11: Expansion of tumor cells in defined, adhesive conditions to isolate, maintain and expand human  
 101 brain tumor-derived long-term self-renewing sphere-forming cells (SFCs). (a) Migratory competence and preference to attach  
 102 to distinct substrates at the time of tissue extraction were compared from the tumor specimens 018-anaplastic ependymoma  
 103 and 019-glioblastoma (*GBM*). In this study, a total of eight different cell populations were chosen for further analysis based  
 104 on their migratory competence and preference to attach to distinct substrates at the time of tissue extraction. In both cases,  
 105 adhesive cell populations expanded stably over prolonged periods of time (evaluated up to 20 passages corresponding to  $25 \pm 5$   
 106 population doublings, PD) without any obvious signs of senescence, or change in morphology. (b) At passage 5 (3-7 PDs),  
 107 substrate-specific cell populations underwent analysis for SFC presence and activity. Migratory cells (mig) derived on Laminin  
 108 / poly-L-ornithine-coated culture dishes (LPO mig populations) contained highest numbers of SFCs, outperforming the  
 109 isolation efficacy of the standard NS assay for both brain tumor specimens. Resident *non-migratory* cells: diss.

110

111

112

113

114

115

116

117

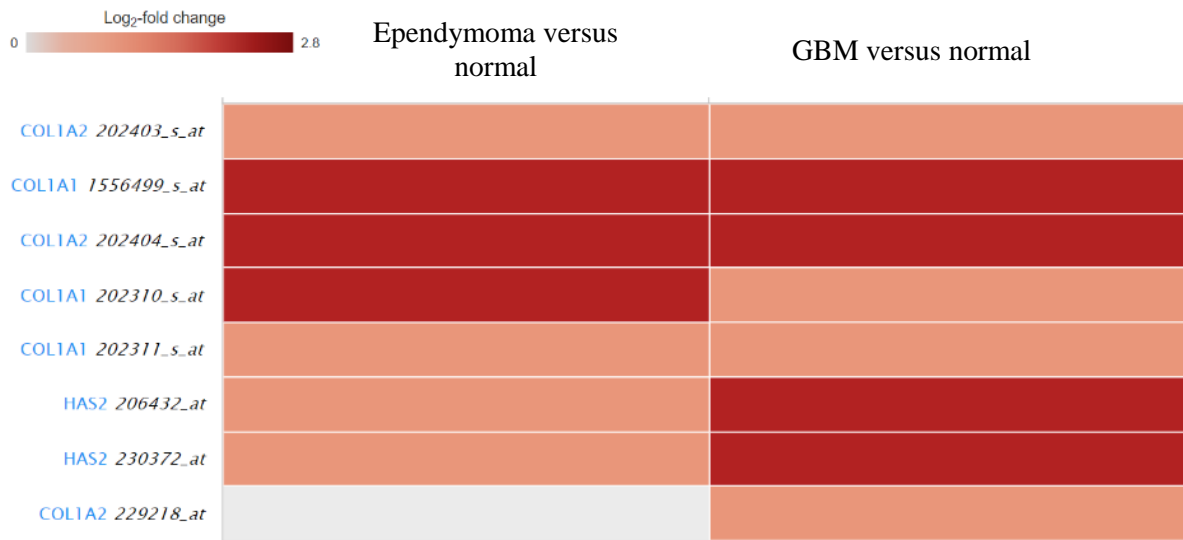

134  
 135  
 136  
 137  
 138  
 139  
 140

Supplementary Figure 12: Differential mRNA expression data from human brain tumors versus normal human brain indicating the upregulation of different collagen I subtypes and hyaluronic acid synthase 2 transcripts in ependymoma and GBM, measured using Affymetrix HU-133PLUS 2.0 GeneChip microarrays [54, 82]. Log-fold change over normal brain tissue.

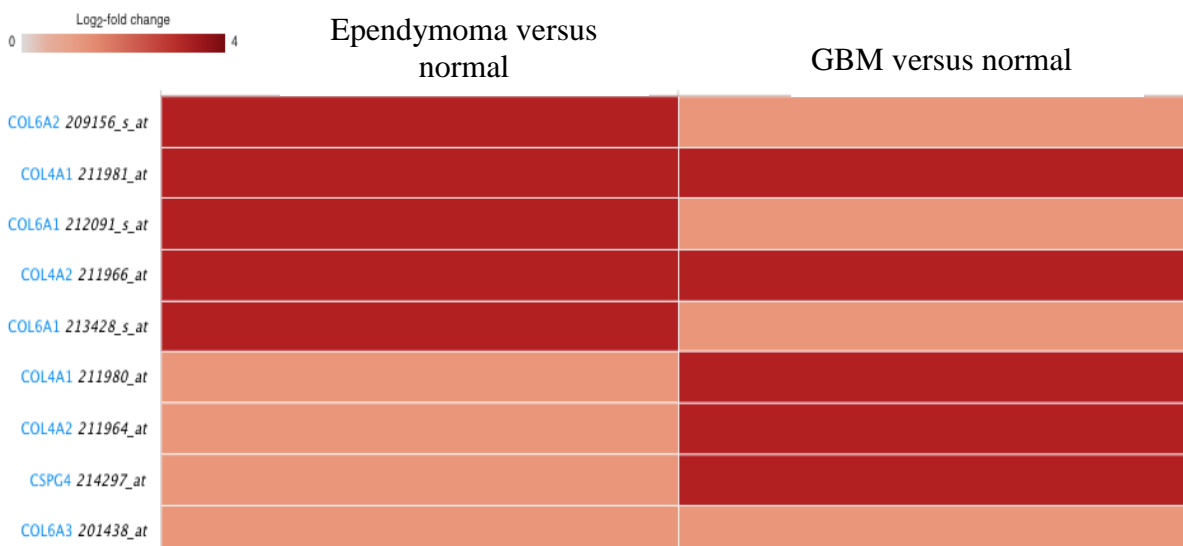

156  
 157  
 158  
 159

Supplementary Figure 13: Differential mRNA expression data from human brain tumors versus normal human brain indicating the upregulation of many collagens and GAGs in ependymoma and GBM, measured using Affymetrix HU-133PLUS 2.0 GeneChip microarray. Log-fold change over normal brain tissue.

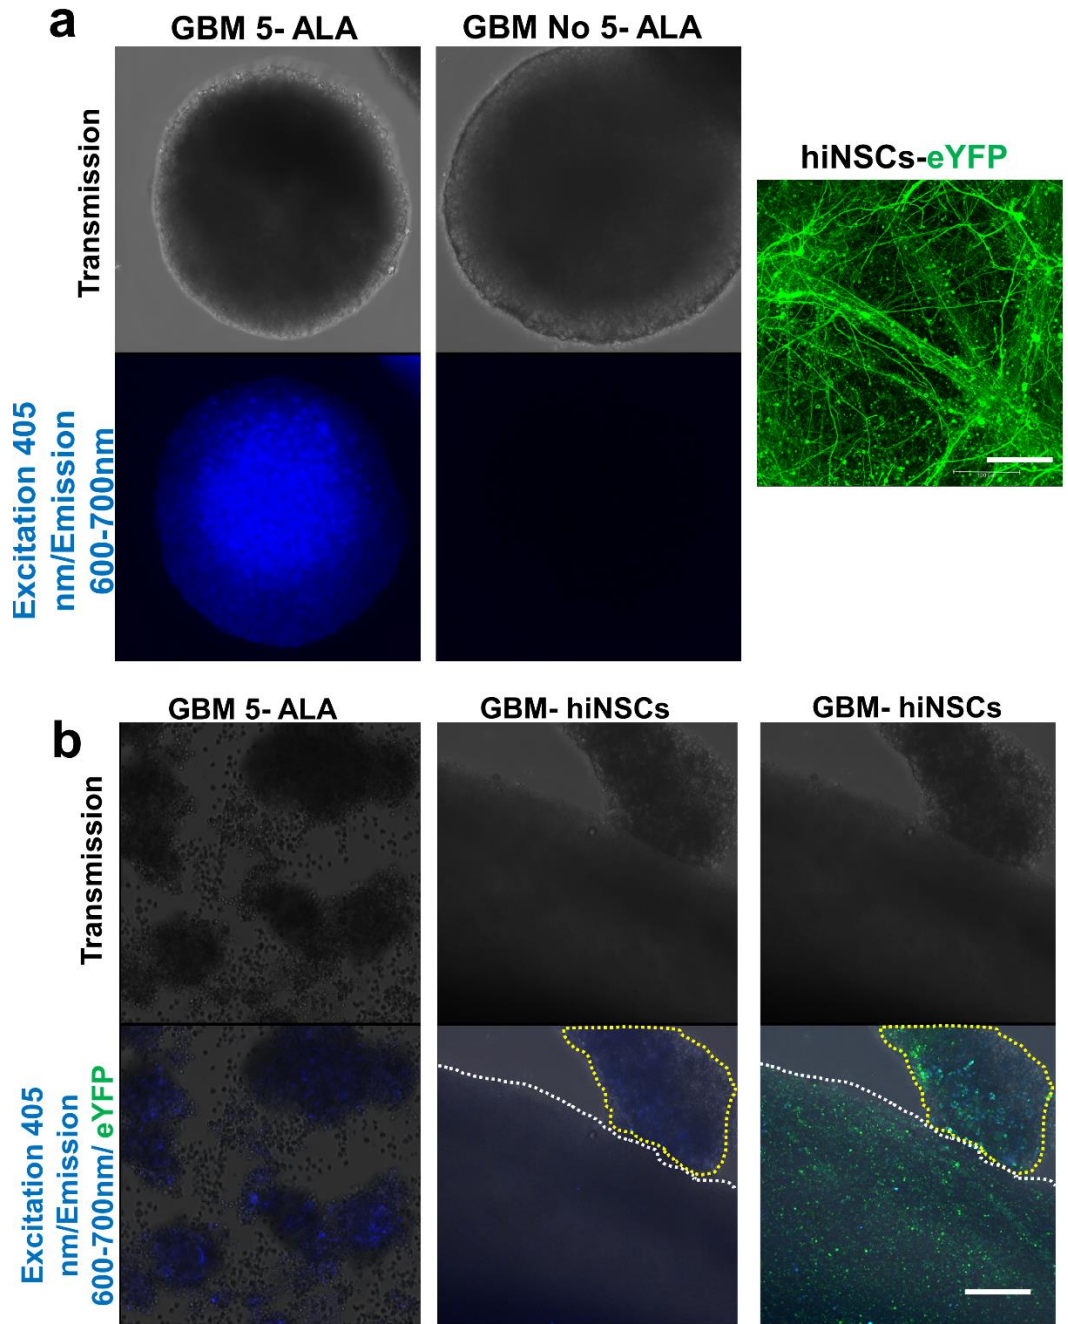

160  
161  
162  
163  
164  
165  
166  
167  
168  
169

Supplementary Figure 14: Coculture of glioblastoma with differentiated human neural stem cells (hNSCs). (a) GBM spheres before combining with hNSCs, with the left panel indicating 5-ALA stained GBM cells post 24 hrs of 5-ALA addition and middle panel the control GBM cells without 5-ALA addition. Differentiated neurons from hNSCs at 4 mo expressing eYFP (rightmost image). (b) 24 hrs post combining 5-ALA stained GBM cells with e-YFP expressing differentiated hNSCs to obtain co-cultures in complete neurobasal media (neurobasal+ B27+ glutamax). Left panel shows unattached GBM cells. Middle panel indicates 5-ALA stained GBM cells (demarcated in yellow) in close proximity and co-culture with hNSCs (demarcated in white), excitation at 405 nm and imaged at an emission wavelength of 600-700nm. Right panel indicates overlay of GBM cell emission based on 5-ALA with emission from hNSCs based on eYFP, indicating cell infiltration post 48 hrs of co-culture. Scale bar=100µm.

170  
171

|        |                                               |
|--------|-----------------------------------------------|
| ANG    | Angiogenin                                    |
| BDNF   | Brain-derived neurotrophic factor             |
| CCL1   | Chemokine ligand 1/I-309/TCA-3                |
| CCL11  | C-C motif chemokine 11/Eotaxin-1              |
| CCL13  | Chemokine ligand 13/MCP-4                     |
| CCL15  | Chemokine ligand 15                           |
| CCL17  | Chemokine ligand 17/TARC                      |
| CCL18  | Chemokine ligand 18/PARC                      |
| CCL2   | Chemokine ligand 2/MCP-1                      |
| CCL20  | Chemokine ligand 20                           |
| CCL22  | Chemokine ligand 22/MDC                       |
| CCL23  | Chemokine ligand 23/CK beta 8-1               |
| CCL24  | Chemokine ligand 24/Eotaxin-2                 |
| CCL26  | Chemokine ligand 26                           |
| CCL4   | Chemokine ligand 4                            |
| CCL5   | Chemokine ligand 5/RANTES                     |
| CCL7   | Chemokine ligand 7/MCP-3/MARC                 |
| CCL8   | Chemokine ligand 8/MCP-2                      |
| CSF1   | Colony stimulating factor 1                   |
| CSF2   | Colony stimulating factor 2                   |
| CSF3   | Colony stimulating factor 3                   |
| CX3CL1 | Chemokine (C-X3-C motif) ligand 1/Fractalkine |
| CXCL1  | Chemokine (C-X-C motif) ligand 1/GRO alpha    |
| CXCL10 | Chemokine (C-X-C motif) ligand 10             |
| CXCL12 | Chemokine (C-X-C motif) ligand 12/SDF-1 alpha |
| CXCL13 | Chemokine (C-X-C motif) ligand 13/BLC         |
| CXCL2  | Chemokine (C-X-C motif) ligand 2              |
| CXCL3  | Chemokine (C-X-C motif) ligand 3              |
| CXCL5  | Chemokine (C-X-C motif) ligand 5/ENA-78       |
| CXCL6  | Chemokine (C-X-C motif) ligand 6/GCP-2        |
| CXCL8  | Chemokine (C-X-C motif) ligand 8/IL-8         |
| CXCL9  | Chemokine (C-X-C motif) ligand 9/MIG          |
| EGF    | Epidermal growth factor                       |
| FGF4   | Fibroblast growth factor 4                    |
| FGF6   | Fibroblast growth factor 6                    |
| FGF7   | Fibroblast growth factor 7                    |
| FGF9   | Fibroblast growth factor 9                    |
| FLT3LG | Fms-related tyrosine kinase 3 ligand          |
| GDNF   | Glial derived neurotrophic factor             |
| HGF    | hepatocyte growth factor                      |
| IFNG   | Interferon gamma (IFN $\gamma$ )              |

|           |                                                             |
|-----------|-------------------------------------------------------------|
| IGF1      | Insulin-like growth factor 1                                |
| IGFBP1    | Insulin-like growth factor-binding protein 1                |
| IGFBP2    | Insulin-like growth factor-binding protein 2                |
| IGFBP3    | Insulin-like growth factor-binding protein 3                |
| IGFBP4    | Insulin-like growth factor-binding protein 4                |
| IL10      | Interleukin 10                                              |
| IL12A     | Interleukin 12 A                                            |
| IL13      | Interleukin 13                                              |
| IL15      | Interleukin 15                                              |
| IL16      | Interleukin 16                                              |
| IL1A      | Interleukin 1A                                              |
| IL1B      | Interleukin 1B                                              |
| IL2       | Interleukin 2                                               |
| IL3       | Interleukin 3                                               |
| IL4       | Interleukin 4                                               |
| IL5       | Interleukin 5                                               |
| IL6       | Interleukin 6                                               |
| IL7       | Interleukin 7                                               |
| KITLG     | Kit ligand/Mast cell growth factor MCF/Stem cell factor SCF |
| LEP       | Leptin                                                      |
| LIF       | Leukemia inhibitory factor                                  |
| LTA       | Lymphotoxin-A                                               |
| MIF       | Macrophage Migration Inhibitory Factor                      |
| NTF3      | Neurotrophin 3                                              |
| NTF4      | Neurotrophin 4                                              |
| OSM       | Oncostatin M                                                |
| PDGFB     | Platelet-derived growth factor subunit B                    |
| PGF       | Placental growth factor                                     |
| PPBP      | Pro-platelet basic protein                                  |
| SPP1      | Osteopontin                                                 |
| TGFB1     | Transforming growth factor beta-1 (TGF $\beta$ -1)          |
| TGFB2     | Transforming growth factor beta-2 (TGF $\beta$ -2)          |
| TGFB3     | Transforming growth factor beta-3 (TGF $\beta$ -3)          |
| THPO      | Thrombopoietin                                              |
| TNF       | Tumor necrosis factor                                       |
| TNFRSF11B | Osteoprotegerin                                             |
| TNFSF14   | Tumor necrosis factor superfamily member 14/LIGHT           |
| TPO       | Thrombopoietin                                              |
| VEGFA     | Vascular endothelial growth factor A                        |
| MMP1      | Matrix metalloproteinase1                                   |
| MMP10     | Matrix metalloproteinase10                                  |
| MMP13     | Matrix metalloproteinase13                                  |
| MMP2      | Matrix metalloproteinase2                                   |



|       |                                               |
|-------|-----------------------------------------------|
| MMP3  | Matrix metalloproteinase3                     |
| MMP8  | Matrix metalloproteinase8                     |
| MMP9  | Matrix metalloproteinase9                     |
| TIMP1 | Tissue inhibitor of matrix metalloproteinase1 |
| TIMP2 | Tissue inhibitor of matrix metalloproteinase2 |
| TIMP4 | Tissue inhibitor of matrix metalloproteinase4 |

173

174
